# Supplementary material for: Facile Construction of a Ternary Ag/TiO₂/g-C₃N₄ Nanocomposite with Boosted Visible- Light Photocatalytic Activity
Source: Research Square preprint supplement (doi:10.21203/rs.3.rs-6826016/v1), 2025-06-12
Supplement: Supplementary file 1 [file 1d8980839e412d7ba3837fdd.docx]

**Facile Construction of a Ternary Ag/TiO₂/g-C₃N₄ Nanocomposite with Boosted Visible-Light Photocatalytic Activity**

Hamza El-Hosainy1,*,o, Alaa A. Alhashash1,2,o Abd El-Motaleb M. Ramadan2, Ezz-Elregal M. Ezz-Elregal3, Rafat Tahway4, Maged El-Kemary1,5,*

1Institute of Nanoscience and Nanotechnology, Kafrelsheikh University, Kafrelsheikh 33511, Egypt

2Chemistry Department, Faculty of Science, Kafrelsheikh University, Kafrelsheikh, Egypt

3Chemistry Department, Faculty of Science, Ain-Shams University, Abbassia, Cairo 11566, Egypt

4Central Metallurgical Research and Development Institute, CMRDI, P.O. Box: 87 Helwan, 11421 Cairo, Egypt

5Nile Valley University-Egypt, Fayoum, 63518, Egypt

**Corresponding Author (***) **:** [elkemary@nano.kfs.edu.eg](mailto:elkemary@nano.kfs.edu.eg), [hamzaelhosainy@gmail.com](mailto:hamzaelhosainy@gmail.com)

**o :** H.E and A.A.contributed equally to this work.

**Fig. S1**. XRD analysis for TiO2 (UV100, Anatase).

**Table S1:** Kinetic rate constant of catalytic and photocatalytic reduction of PNP with various catalysts.

| K min-1 (photocatalytic) | K min-1  (catalytic) | Catalyst |
| --- | --- | --- |
| 0.0099*10-4 | 6.345 *10-5 | TiO2/g-C3N4 |
| 0.153 | 0.0012*10-4 | 0.5% Ag/TiO2/g-C3N4 |
| 0.195 | 0.0505 | 1% Ag/TiO2/g-C3N4 |
| 0.472 | 0.1572 | 2% Ag/TiO2/g-C3N4 |
| 0.228 | 0.0382 | 2% Ag/TiO2 (A)/g-C3N4 |

**Table S2:** Catalytic and photocatalytic activities of various catalysts compared with this work.

1. **Catalytic**

| Refs | Decomposition  (%) | Time  (min) | Target | Catalyst |
| --- | --- | --- | --- | --- |
| [1] | 100 | 10 | NP | 6%Au/g-C3N4 |
| [2] | 100 | 15 | NP | 4.35%Alginate/Ag |
| [3] | 100 | 60 | NP | Ag/ g-C3N4 2D / g-C3N4 QDs |
| [4] | 100 | 60 | NP | 1.5%Ag/g-C3N4/V2O5 |
| This work | 95.6 | 20 | NP | 2%Ag/TiO2/g-C3N4 |

1. **Photocatalytic**

| Refs | Decomposition (%) | Time (min) | Target | Catalyst |
| --- | --- | --- | --- | --- |
| [1] | 100 | 8 | NP | 6%Au/g-C3N4 |
| [5] | 98 | 120 | NP | 5%Ag/g-C3N4 |
| [4] | 100 | 8 | NP | 1.5 Ag/g-C3N4/V2O5 |
| [6] | 100 | 35 | NP | TiO2\CoFe2O4 |
| [7] | 79 | 60 | NP | gC3N4\ZnBi2O4 |
| [8] | 95 | 150-180 | NP | Ag/TiO2/g-C3N4 |
| [9] | >90 | 12 | NP | Ni0.5Mn0.5Co2O4 |
| [10] | 81 | 120 | NP | Mg doped ZnO |
| [11] | 63.2 | 120 | NP | Ca2+-Doped AgInS2 |
| This work | 100 | 6.5 | NP | 2%Ag/TiO2/g-C3N4 |

**References**

1. Fu, Y., et al., *Reduction of nitrophenols to aminophenols under concerted catalysis by Au/g-C3N4 contact system.* 2017. **202**: p. 430-437.

2. Zhao, X., et al., *Alginate fibers embedded with silver nanoparticles as efficient catalysts for reduction of 4-nitrophenol.* 2015. **5**(61): p. 49534-49540.

3. Maged, S., et al., *Efficient photocatalytic reduction of p-nitrophenol under visible light irradiation based on Ag NPs loaded brown 2D g-C3N4 / g-C3N4 QDs nanocomposite.* Environmental Science and Pollution Research, 2023. **30**(55): p. 117909-117922.

4. El-Sheshtawy, H.S., et al., *Facile immobilization of Ag nanoparticles on g-C3N4/V2O5 surface for enhancement of post-illumination, catalytic, and photocatalytic activity removal of organic and inorganic pollutants.* 2019. **467**: p. 268-276.

5. Yang, Y., et al., *Preparation and enhanced visible-light photocatalytic activity of silver deposited graphitic carbon nitride plasmonic photocatalyst.* 2013. **142**: p. 828-837.

6. Ibrahim, I., et al., *Photocatalysis as an advanced reduction process (ARP): The reduction of 4-nitrophenol using titania nanotubes-ferrite nanocomposites.* 2019. **372**: p. 37-44.

7. Nithya, R., S.J.J.o.P. Ayyappan, and P.A. Chemistry, *Novel exfoliated graphitic-C3N4 hybridised ZnBi2O4 (g-C3N4/ZnBi2O4) nanorods for catalytic reduction of 4-Nitrophenol and its antibacterial activity.* 2020. **398**: p. 112591.

8. Ibrahim, I., et al., *Silver decorated TiO2/g-C3N4 bifunctional nanocomposites for photocatalytic elimination of water pollutants under UV and artificial solar light.* 2022. **14**: p. 100470.

9. Cancino-Gordillo, F.E., J.-L. Ortiz-Quiñonez, and U.J.A.S.S. Pal, *Rapid nitrophenol degradation using gel-combustion synthesized nickel/manganese cobaltite (Ni1− xMnxCo2O4) nanoparticles.* 2024. **659**: p. 159873.

10. Tanji, K., et al., *Experimental and theoretical investigation of enhancing the photocatalytic activity of Mg doped ZnO for nitrophenol degradation.* 2023. **136**(2): p. 1125-1142.

11. Wang, X., et al., *Visible Light Motivated the Photocatalytic Degradation of P-Nitrophenol by Ca2+-Doped AgInS2.* 2024. **29**(2): p. 361.
